# Supplementary material for: Geographical distribution of genetic diversity in Secale landrace and wild accessions
Source: PubMed Central journal article supplement (PMC4719562; doi:10.1186/s12870-016-0710-y), 2016-01-19

A) *S. cereale*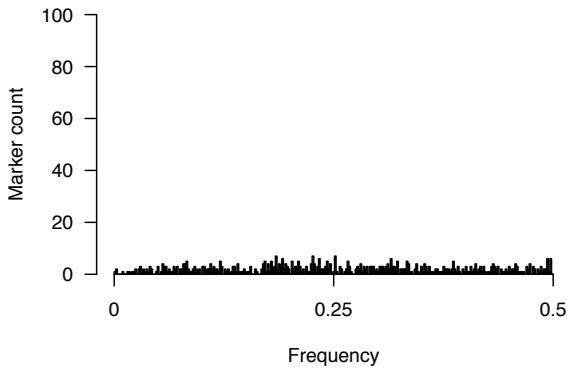B) *S. strictum*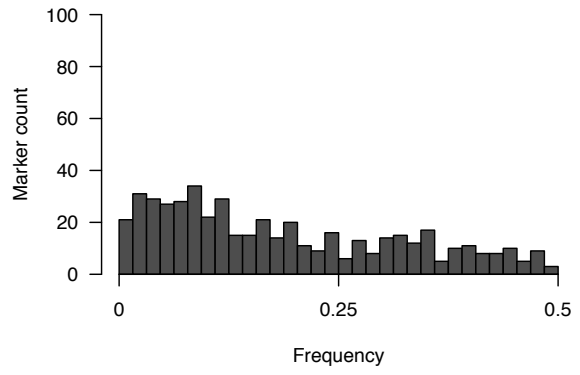C) *S. vavilovii*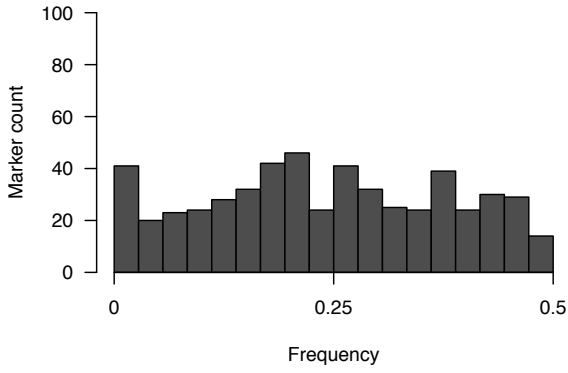D) *S. africanum*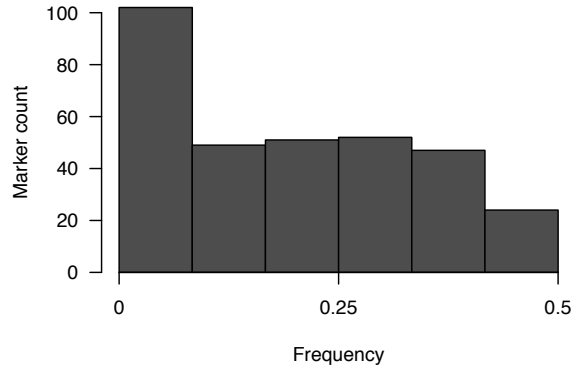E) *S. cereale ssp. dighoricum*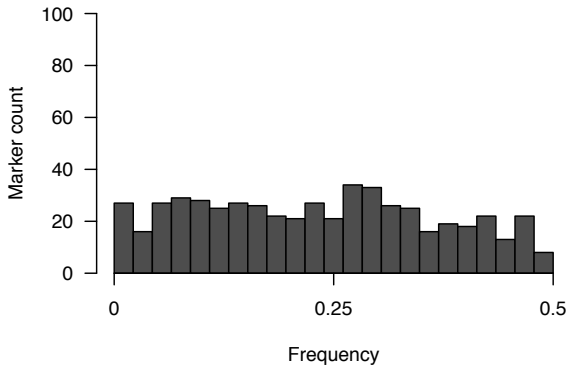F) *S. cereale ssp. ancestrale*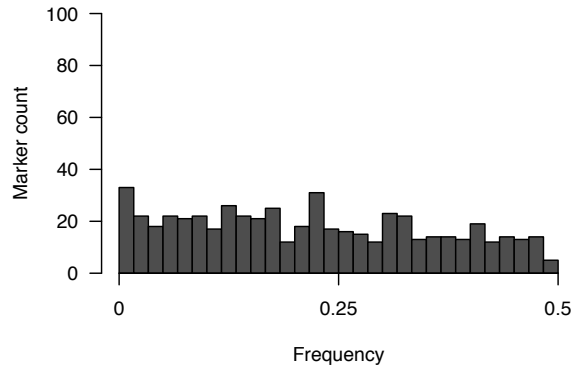G) *S. cereale ssp. afghanicum*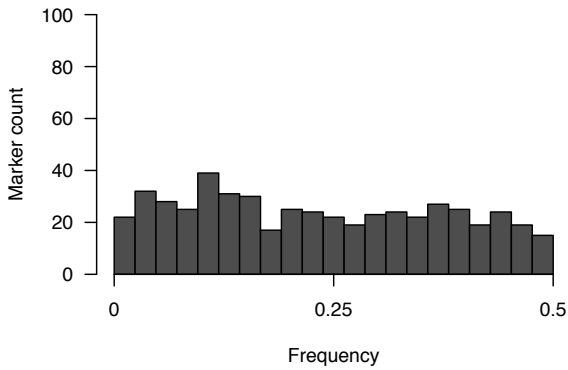H) *S. cereale ssp. segetale*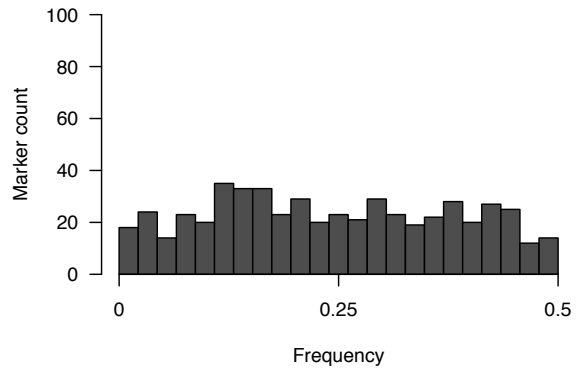

Supplement: 12870_2016_710_MOESM3_ESM.pdf [file 12870_2016_710_MOESM3_ESM.pdf]
