# Supplementary material for: Geographical distribution of genetic diversity in Secale landrace and wild accessions
Source: PubMed Central journal article supplement (PMC4719562; doi:10.1186/s12870-016-0710-y), 2016-01-19

### A) Wild rye

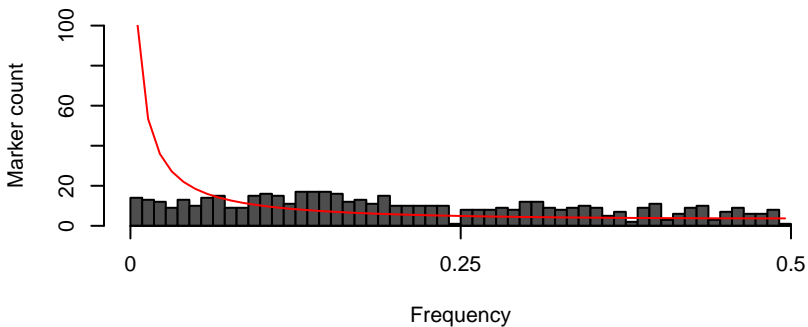

### B) Feral rye

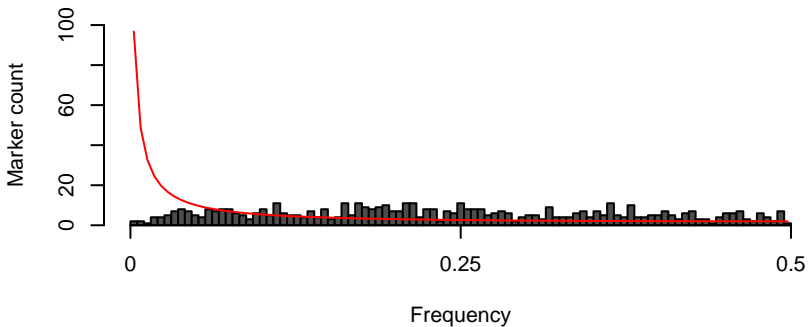

### C) Cultivated rye

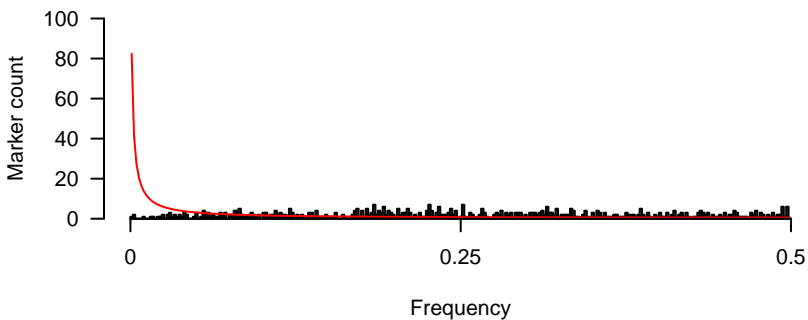

Supplement: 12870_2016_710_MOESM4_ESM.pdf [file 12870_2016_710_MOESM4_ESM.pdf]
