# Supplementary material for: Geographical distribution of genetic diversity in Secale landrace and wild accessions
Source: PubMed Central journal article supplement (PMC4719562; doi:10.1186/s12870-016-0710-y), 2016-01-19

**Complete set**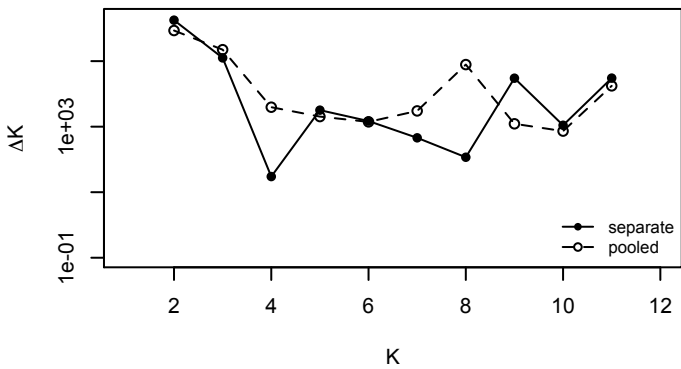**Complete set**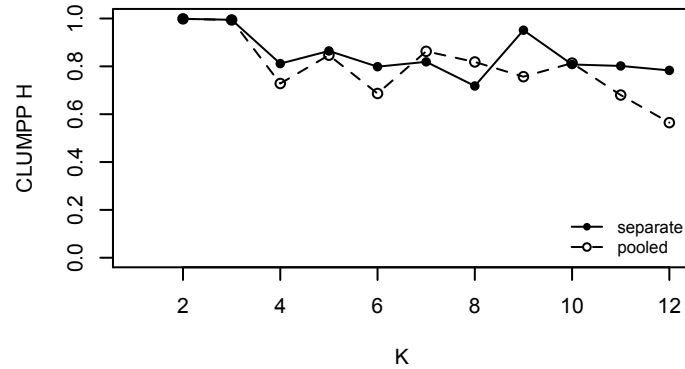**Cultivated rye**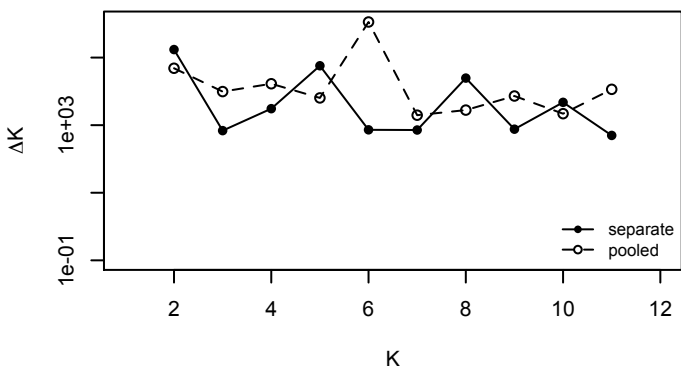**Cultivated rye**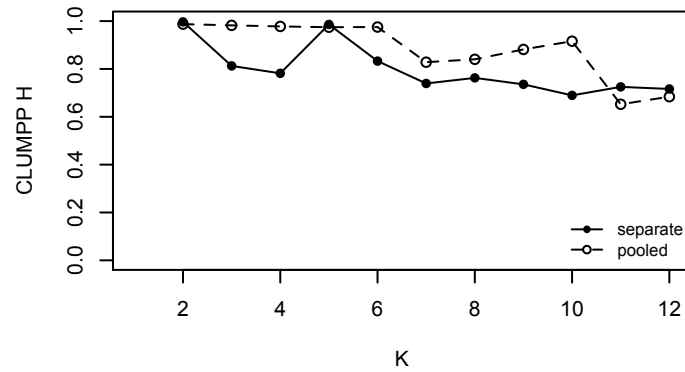**Wild and feral rye**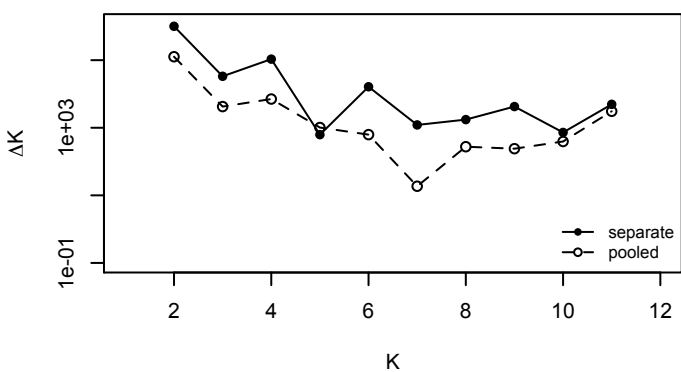**Wild and feral rye**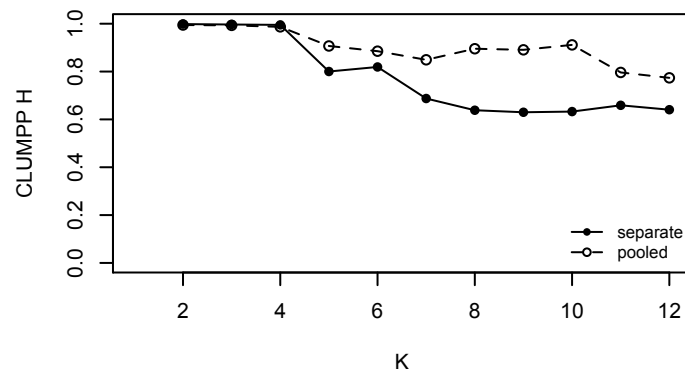**Fennoscandia and Russia**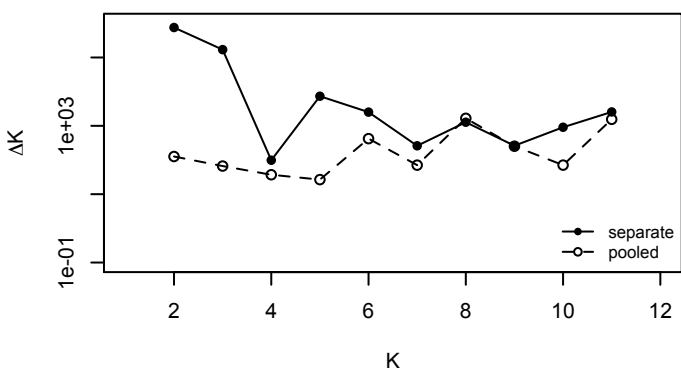**Fennoscandia and Russia**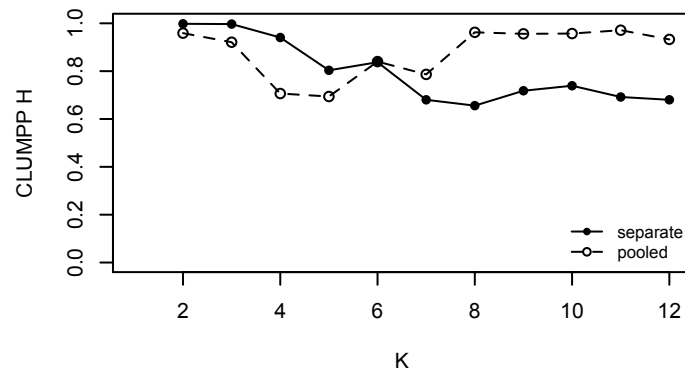**Iberia and Morocco**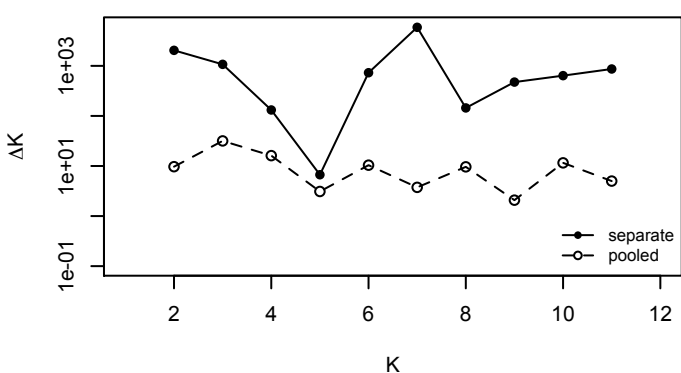**Iberia and Morocco**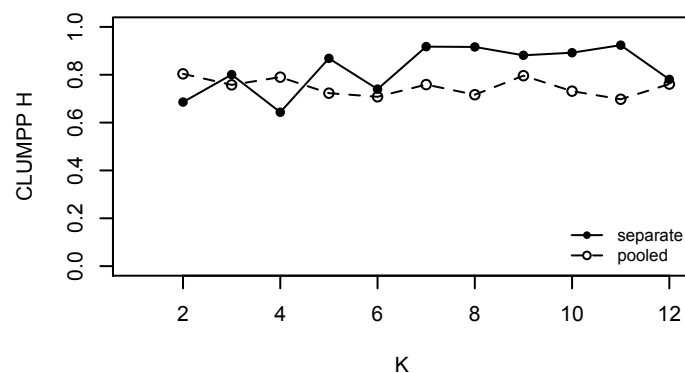

Supplement: 12870_2016_710_MOESM5_ESM.pdf [file 12870_2016_710_MOESM5_ESM.pdf]
