# Supplementary material for: Geographical distribution of genetic diversity in Secale landrace and wild accessions
Source: PubMed Central journal article supplement (PMC4719562; doi:10.1186/s12870-016-0710-y), 2016-01-19
Supplement: 12870_2016_710_MOESM6_ESM.pdf [file 12870_2016_710_MOESM6_ESM.pdf]

*S. africanum* *S. strictum* *S. vavilovii* *S. afghanicum* *S. ancestrale* *S. tighoricum* *S. segetale* *S. cereale* *S. cereale* (breeds)

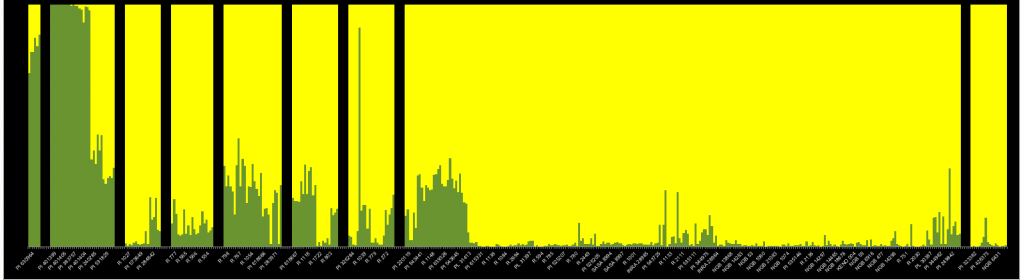

K=2

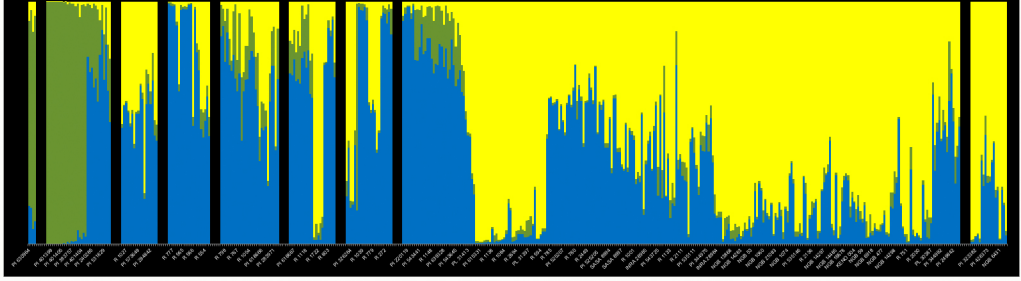

K=3

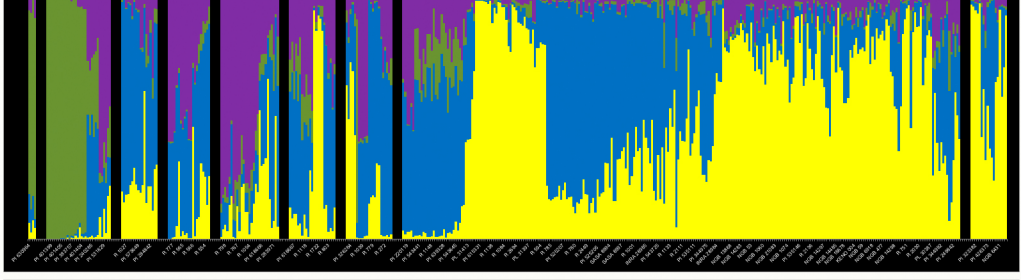

K=4

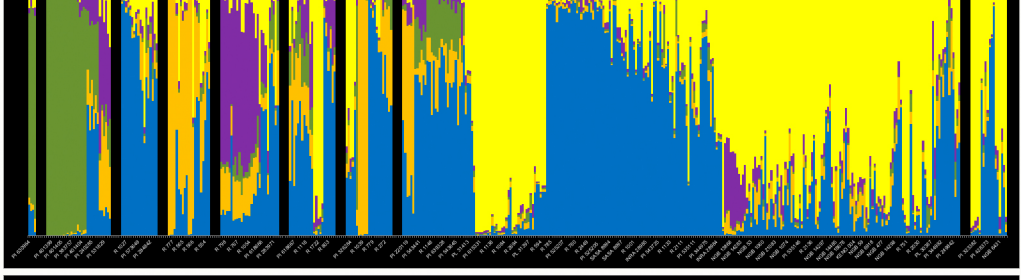

K=5

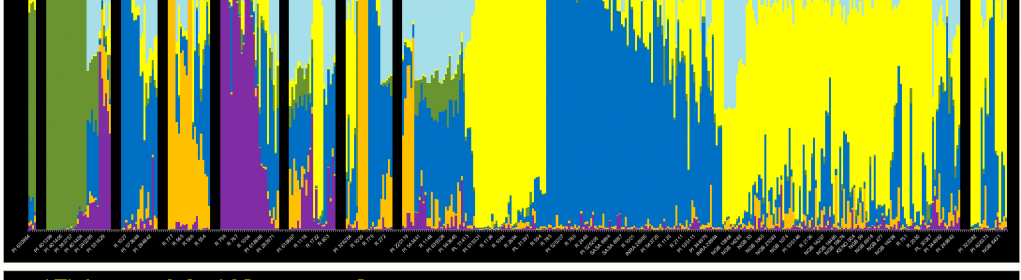

K=6

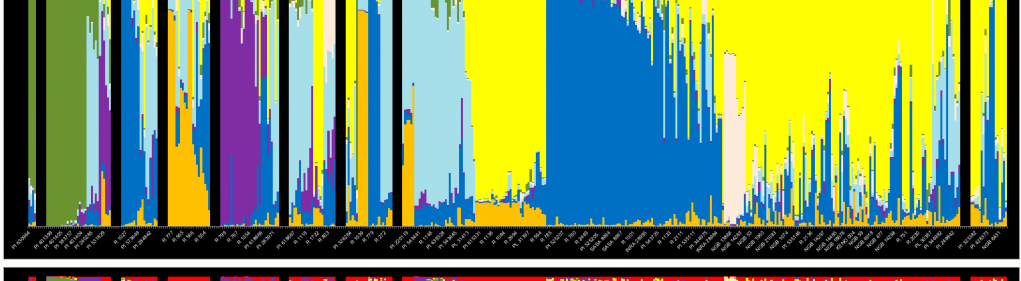

K=7

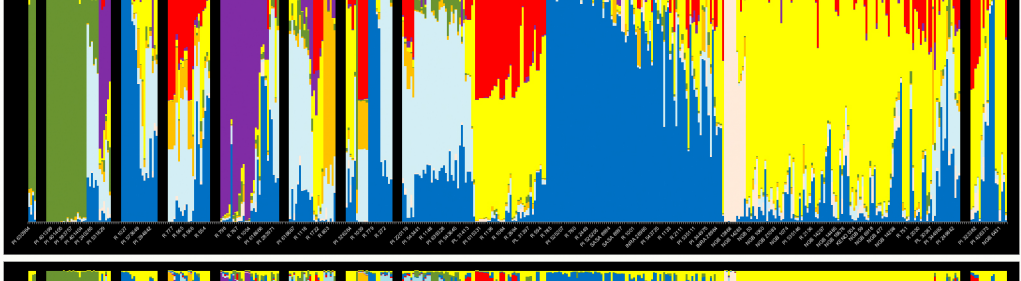

K=8

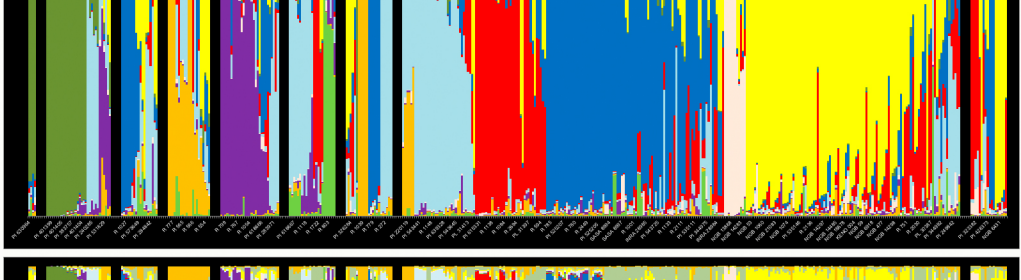

K=9

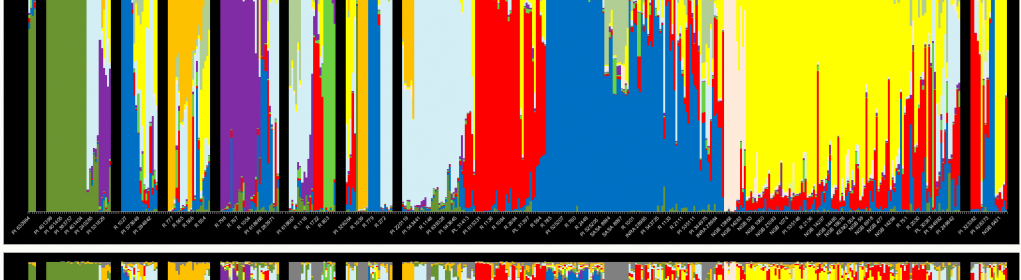

K=10

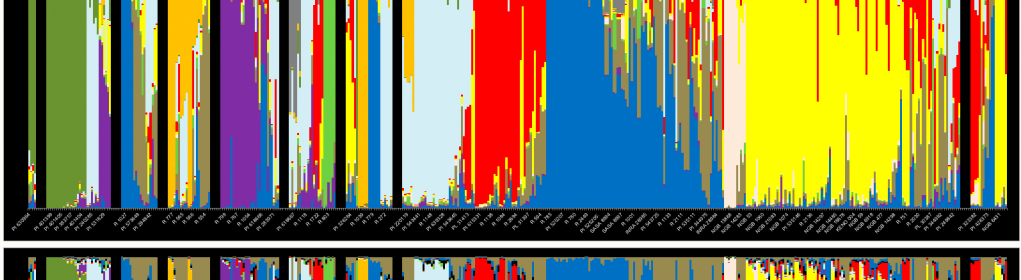

K=11

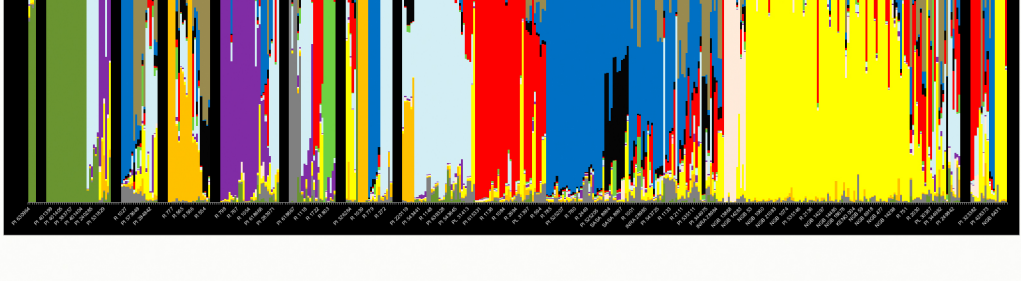

K=12
