# Supplementary material for: Geographical distribution of genetic diversity in Secale landrace and wild accessions
Source: PubMed Central journal article supplement (PMC4719562; doi:10.1186/s12870-016-0710-y), 2016-01-19

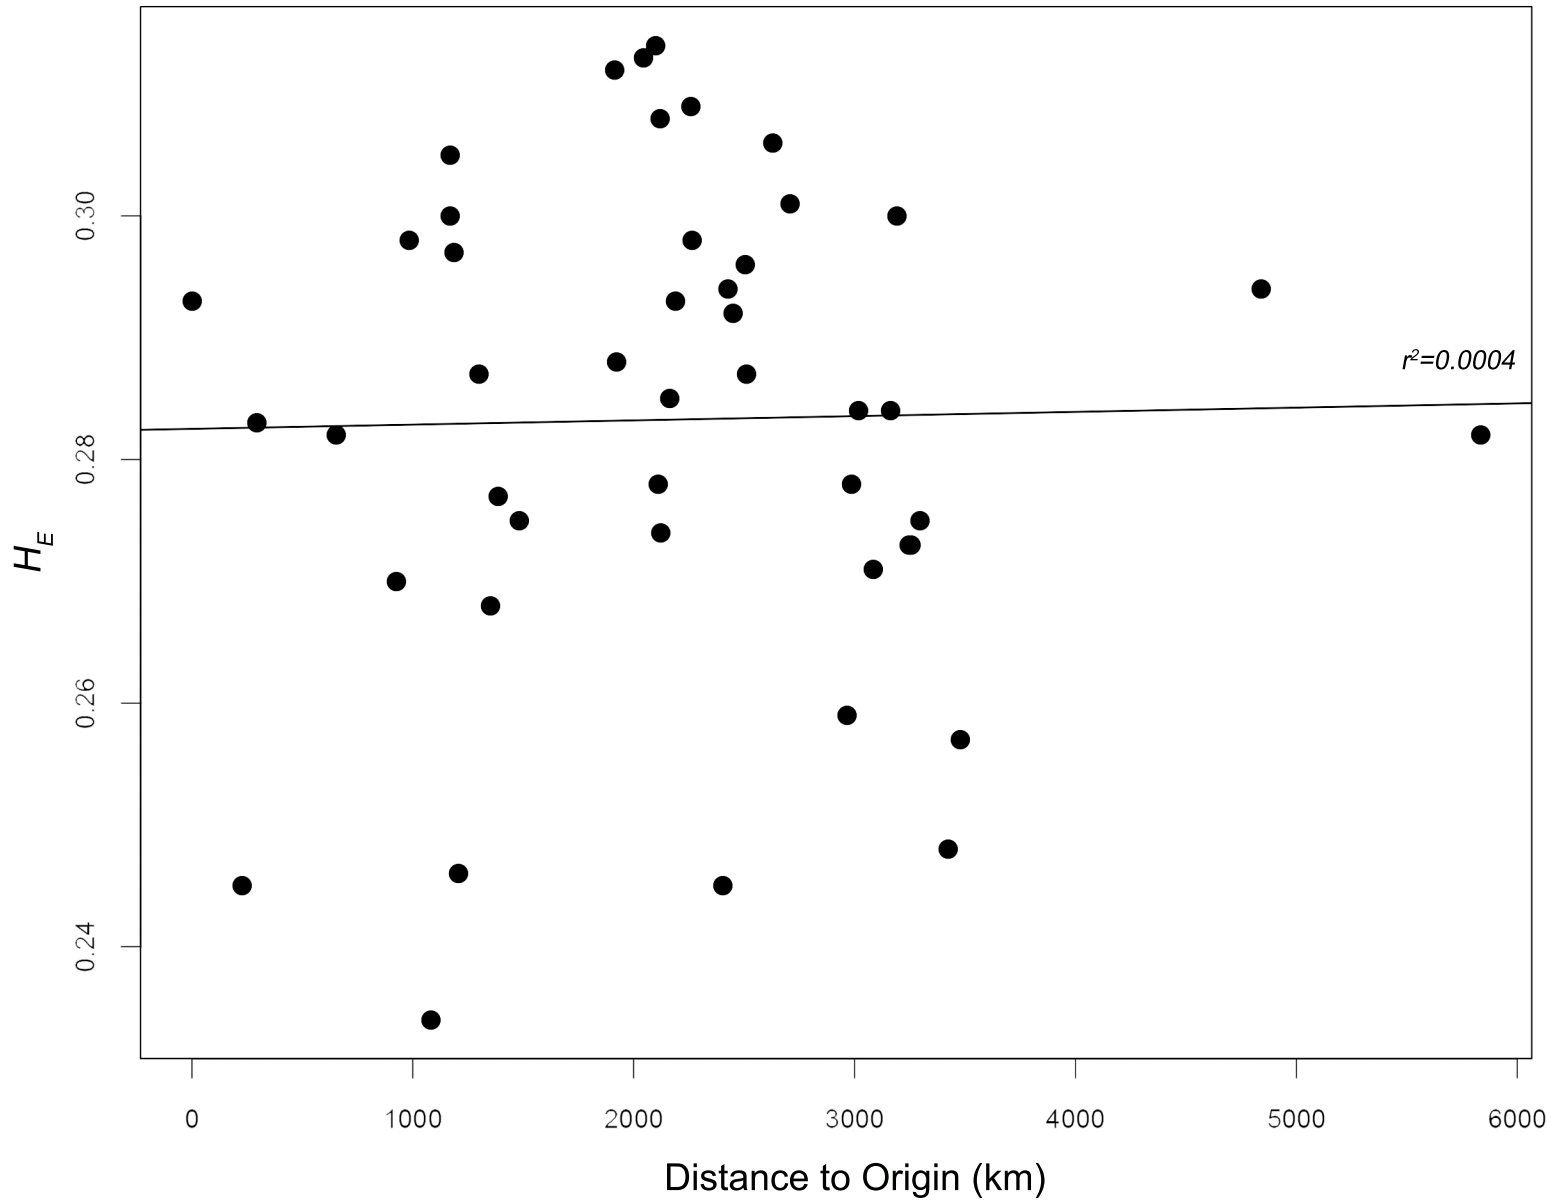

Supplement: 12870_2016_710_MOESM11_ESM.pdf [file 12870_2016_710_MOESM11_ESM.pdf]
